# Supplementary material
Source: Springer Nature journal article supplement (https://www.springermedizin.de/resource/supplementary/12871_2011_108_MOESM4_ESM.pdf/9428850)

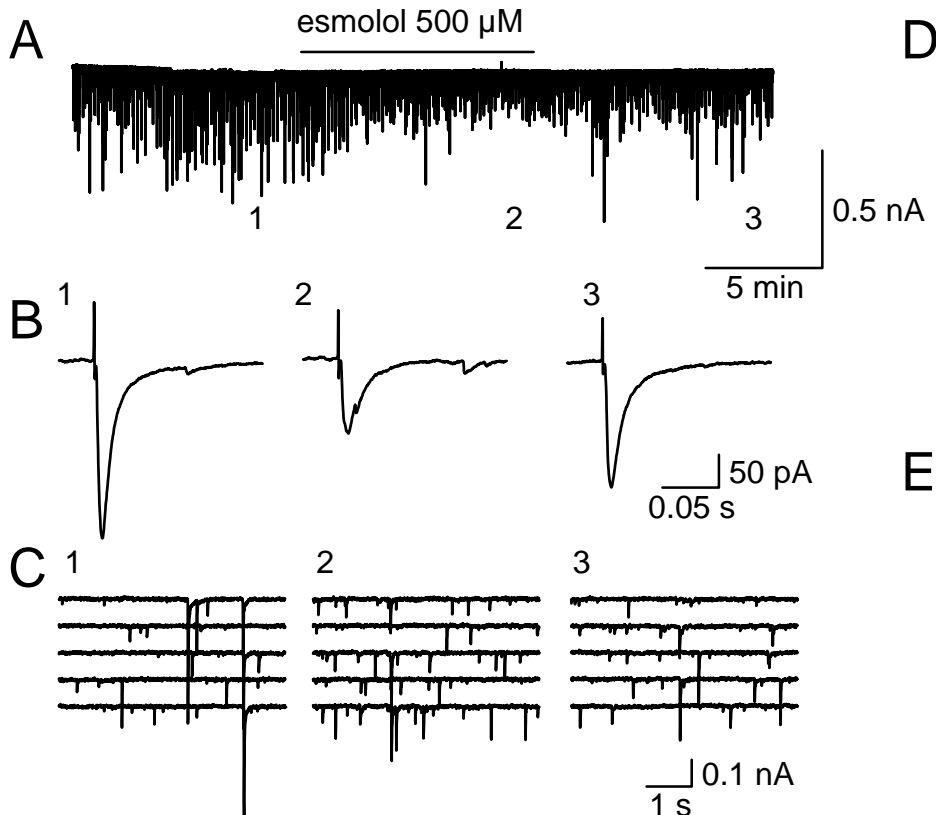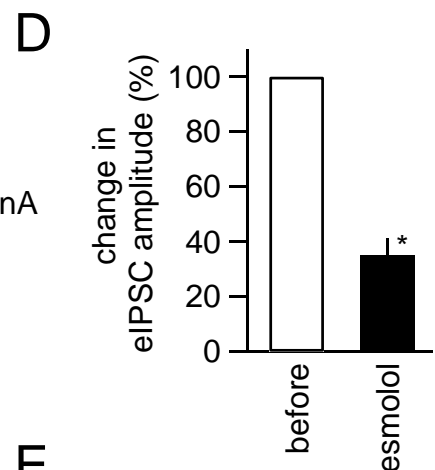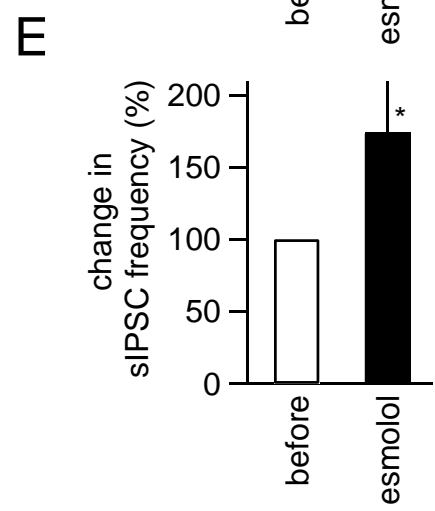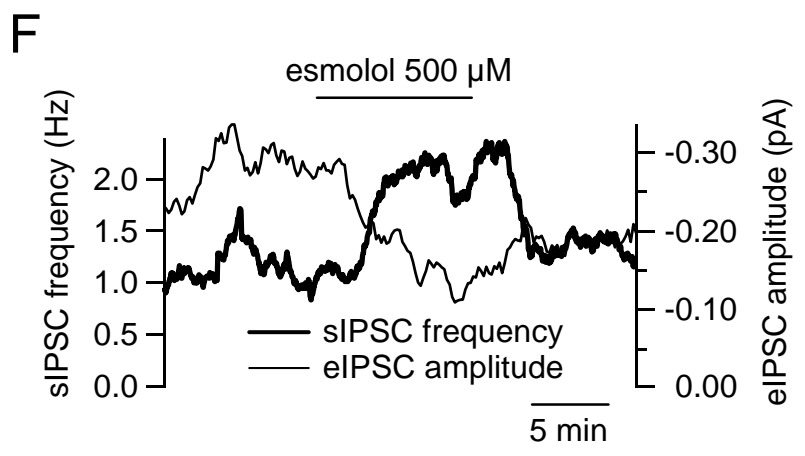

Supplement: MOESM4 [file 9428850]
